# Supplementary material for: Maternal postnatal depressive symptoms and offspring emotional and behavioural development at age 7 years in a UK-birth cohort: the role of paternal involvement
Source: PubMed Central journal article supplement (PMC7615033; doi:10.1037/dev0001482), 2022-11-17
Supplement: EMS184919-supplement-Supplementary_material.pdf [file EMS184919-supplement-Supplementary_material.pdf]

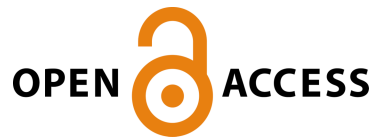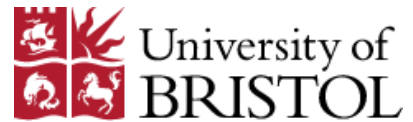

Culpin, I., Hammerton, G. L., Stein, A., Bornstein, M. H., Tiemeier, H., Cadman, T., Fredriksen, E., Evans, J., Miller, T., Dermott, E., Heron, J. E., Sallis, H. M., & Pearson, R. M. (Accepted/In press). Maternal postnatal depression and offspring emotional and behavioural development at age 7 years in a UK-birth cohort: the role of paternal involvement. *Developmental Psychology*.  
<https://doi.org/10.1037/dev0001482>

Peer reviewed version

Link to published version (if available):  
[10.1037/dev0001482](https://doi.org/10.1037/dev0001482)

[Link to publication record in Explore Bristol Research](#)  
PDF-document

This is the accepted author manuscript (AAM). The final published version (version of record) is available online via Wiley at <https://doi.org/10.1037/dev0001482>. Please refer to any applicable terms of use of the publisher.

## University of Bristol - Explore Bristol Research

### General rights

This document is made available in accordance with publisher policies. Please cite only the published version using the reference above. Full terms of use are available:  
<http://www.bristol.ac.uk/red/research-policy/pure/user-guides/ebr-terms/>

# MATERNAL POSTNATAL DEPRESSIVE SYMPTOMS AND OFFSPRING DEVELOPMENT: ROLE OF PATERNAL INVOLVEMENT

## **Maternal postnatal depressive symptoms and offspring emotional and behavioural development at age 7 years in a UK-birth cohort: the role of paternal involvement**

### **Supplemental Material**

#### **Method**

##### **Measures**

##### ***Mediators: Child-Focused and Mother-Influenced Dimensions of Paternal Involvement***

Potential parenting items (>150) were extracted from paternal self-reported questionnaires administered on 5 occasions postnatally (8 weeks and 8 months, 1 year 9 months, 2 years 9 months, 3 years 11 months). Extracted items captured various dimensions of paternal involvement, which were initially double-rated and independently assigned into theoretical dimensions by three researchers (IC, RP and TC). This iterative process was followed by larger research group discussions with significant input from experts in early child development and parenting (AS and MB). Individual items fell into two theoretically distinct sources of paternal involvement: (1) *child-focused* paternal involvement capturing behavioural, affective and cognitive dimensions directed at the child; and (2) *mother-influenced* paternal involvement with the child through the lens of maternal expectations, mother-father relationship and indirect material care through support of the mother. The mother-influenced dimensions of paternal involvement acknowledge those aspects that are done for the child but do not entail interactions with the child, as well as the impact of inter-parental relationship on parent-child relationship (Cabrera et al., 2014; Pleck, 2012). It has been argued that men's engagement and interactions with their children need to be understood through the lens of maternal influences (Marsiglio et al., 2000; Palkovitz, 2019). Arguably fathers are more involved when their female partners have supportive attitudes

## MATERNAL POSTNATAL DEPRESSIVE SYMPTOMS AND OFFSPRING DEVELOPMENT: ROLE OF PATERNAL INVOLVEMENT

regarding paternal involvement, and less involved when inter-parental relationship is characterised by underlying conflict, marital dissatisfaction and maternal ‘gatekeeping’ (maternal beliefs and practices that discourage or facilitate paternal involvement; Feldman, 2000; Miller, 2018). Evidence suggests that such influences may be more pronounced for paternal rather maternal involvement and parenting behaviours (Belsky et al., 1991; Schacht et al., 2009). Supporting the mother through sharing household tasks and responsibilities is another important dimension of paternal mother-influenced involvement (Cabrera et al., 2014). It may not directly land itself into an aspect of involvement, however, variations in this behaviour may have important implications for the child (Feldman, 2000; Pleck, 2012).

The final factors capturing child-focused paternal involvement (Table S1) encompassed: behavioural (e.g., direct involvement in caregiving), affective (e.g., quality of father-child relationship, such as enjoyment and warmth, conflictual relationship with and worries about the child), and cognitive (e.g., paternal parenting confidence and beliefs regarding caregiving) dimensions. The final factors capturing mother-influenced paternal involvement (Table S2) included: paternal perceptions of maternal beliefs or practices that discourage or facilitate his involvement in childcare (e.g., maternal ‘gatekeeping’), paternal help with household tasks and responsibilities (e.g., preparing meals and cleaning home), paternal beliefs regarding mother-father relationship and its impact on parenting (e.g., partner feels hurt by attention mother gives child) and maternal expectations around employment and parenthood (e.g., mother expects partner to take child after work).

### ***Potential Baseline Confounders: Child Polygenic Score for Neuroticism, Socioeconomic, Parental and Family Characteristics***

Analyses were adjusted for child polygenic score (PGS) for neuroticism. Genotyped data were available for 8,237 children in the ALSPAC cohort. Previously, 116 independent

## MATERNAL POSTNATAL DEPRESSIVE SYMPTOMS AND OFFSPRING DEVELOPMENT: ROLE OF PATERNAL INVOLVEMENT

variants robustly associated with neuroticism have been identified (Luciano et al., 2018). Of these original variants, 109 were available in the ALSPAC participants with the genetic data. Neuroticism PGS scores were calculated as the sum of the number of copies of each effect allele carried by an individual (ranging from 0 to 2 for each SNP), multiplied by the effect estimate identified in the original GWAS. These weighted standardised neuroticism PGS sum scores were included in the analyses.

### ***Potential Intermediate Confounder: Paternal Postnatal Depression***

Analyses were adjusted for paternal postnatal depression (PND) as a potential exposure induced intermediate confounder of the mediator-outcome association (Cole & Hernán, 2002; Sheikh et al., 2016). Paternal PND (self-reported depressive symptoms, no a clinical diagnosis) was assessed using the Edinburgh Postnatal Depression Scale (EPDS; Cox et al., 1987) administered to fathers at 8 months postnatally. The EPDS is a 10-item self-reported depression questionnaire, validated and used extensively to screen for depression during the perinatal period in women and men (Massoudi et al., 2013; Matthey et al., 2001). Individual items were summed-up to derive a continuous measure (score range 0-24, with higher scores indicating more severe depressive symptoms) to capture the full variation in depressive symptoms.

### **Statistical analysis**

#### ***Latent Factor Models***

Individual parenting items were loaded onto the hypothesised parenting dimensions and modelled using Confirmatory Factor Analyses (CFA). To identify the model, the mean of the latent factors was fixed to '0' and their variance to '1'. The majority of individual items loaded strongly onto the factors that they were initially theoretically assigned to. However,

## MATERNAL POSTNATAL DEPRESSIVE SYMPTOMS AND OFFSPRING DEVELOPMENT: ROLE OF PATERNAL INVOLVEMENT

some items were moved between the factors if modification indices from the initial model indicated that items would be a better fit on the alternative factor, and this made theoretical sense following discussions by the research group. Additional correlations between similar items that were collected at different time points were added into the models to account for shared variance related to time and the repeated nature of the questions. Derived factors, items and factor loadings for each of the measurement models (child-focused and mother-influenced paternal involvement) are presented in Tables S1-S2.

### *Direct and Mediated Effects*

First, we estimated the unadjusted models composed of exposure, outcome and mediators only. Second, we estimated models adjusted for child PGS and all antenatal baseline confounders (Model 1), and further adjusted for paternal PND (8 months) as a possible intermediate confounder of the mediator-outcome association (Model 2), which is also a mediator of the exposure -> mediator association. Thus, our path-specific effects of interest were: (i) Model 1: the indirect effect composed of maternal PND -> paternal involvement -> offspring emotional and behavioural development pathways, and the direct effect, which is the pathway from maternal PND to offspring emotional and behavioural development; (ii) Model 2: the indirect effect composed of a combination of pathways maternal PND -> paternal PND-> paternal involvement -> offspring emotional and behavioural development and maternal PND -> paternal involvement -> offspring emotional and behavioural development pathways, and the direct effect, which is a combination of maternal PND -> paternal PND -> offspring emotional and behavioural development pathways and maternal PND -> offspring emotional and behavioural development pathway. Figure 4a-b represent pathways that constitute total indirect (bold lines) and direct (dashed lines) pathways. We used MODEL INDIRECT (Model 1) and MODEL CONSTRAINT

## MATERNAL POSTNATAL DEPRESSIVE SYMPTOMS AND OFFSPRING DEVELOPMENT: ROLE OF PATERNAL INVOLVEMENT

(Model 2) commands in *Mplus* v.8.3 (Muthén & Muthén, 2015) to estimate direct, total indirect and specific indirect effects with a WLSMV estimator to model continuous and categorical variables.

### ***Missing Data: Multiple Imputation***

We imputed missing data due to loss to follow-up because ignoring those with missing data may result in bias by assuming that data are Missing Completely at Random (MCAR; Sterne et al., 2009). We repeated direct and mediated effects analyses on the imputed datasets to account for the loss to follow-up. We used Multivariable Imputation by Chained Equations (MICE; Royston & White, 2011) to impute missing data in exposure, outcome and confounders (except child neuroticism PGS; n=6,029) using the *ice* command in Stata v.15.1/MP (Stata.Corp., Texas, USA). We did not impute child neuroticism PGS from the phenotype data due to restrictions associated with quality control and participant consent. ALSPAC provides a wealth of rich, prospectively collected data on a range of sociodemographic, mental health and developmental variables, which enabled us to account for missing data in exposure, outcome and confounders, as well as factors that explain missingness, validating the Missing-At-Random assumption (MAR; White et al., 2011). However, the decision was taken not to impute mediators (child-focused and mother-influenced dimensions of paternal involvement) as there are no sufficient auxiliary data on fathers' parenting in the ALSPAC cohort to justify the plausibility of MAR assumption. The imputation model was fully compatible with the main analyses. Using binary, ordinal logistic and linear regression models as appropriate, 50 imputed datasets by 10 cycles of regression switching were generated. Monte-Carlo errors were less than 10% of the standard error and FMI values were no larger than 0.5, suggesting that 50 imputed datasets were sufficient (White et al., 2011). Each imputation model contained all variables in the substantive

## MATERNAL POSTNATAL DEPRESSIVE SYMPTOMS AND OFFSPRING DEVELOPMENT: ROLE OF PATERNAL INVOLVEMENT

analyses along with over 40 auxiliary variables pertaining to maternal and paternal characteristics (e.g., paternal age) and psychopathology, offspring development and mental health, as well maternal and paternal indices of socioeconomic adversity. MICE imputations were carried out in Stata v.15.1/MP (Stata.Corp., Texas, USA). The imputed datasets were exported into *Mplus* v.8.3 (Muthén & Muthén, 2015) to estimate direct and indirect (mediated) pathways using MODEL CONSTRAINT command.

### Results S1

#### Paternal Involvement Factors

Full details of six factors capturing child-focused and four factors capturing mother-influenced aspects of paternal involvement are provided below.

##### *Child-Focused Paternal Involvement*

*Factor 1 Paternal parenting confidence:* 11 items relating to paternal feelings of confidence in the parenting role and perceptions of the ability to engage effectively in parenting behaviours (e.g., ‘partner feels confident with child’, ‘partner unsure if doing the right thing’, ‘partner happy with the way he brings up child’) were extracted from paternal self-reported questionnaires administered at 8 weeks, 8 months, 1 year 9 months and 2 years 9 months. Higher factor scores represented higher levels of paternal parenting confidence.

*Factor 2 Paternal conflictual relationship with child:* 19 items relating to conflict, harsh disciplining and irritation with the child (e.g., ‘child gets on partner’s nerves’, ‘partner dislikes mess surrounding child’, ‘smacking is the best way to discipline child’) were extracted from paternal self-reported questionnaires administered at 8 weeks, 8 months, 1 year 9 months and 2 years 9 months. Higher factor scores signified lower levels of conflictual parent-child relationship, irritation with the child and less harshness in paternal disciplining.

## MATERNAL POSTNATAL DEPRESSIVE SYMPTOMS AND OFFSPRING DEVELOPMENT: ROLE OF PATERNAL INVOLVEMENT

*Factor 3 Paternal enjoyment and warmth:* 27 items relating to feelings of enjoyment, affection, love and warmth toward the child (e.g., ‘partner enjoys child’, ‘partner feels very close to child’, ‘child gives great joy’) were extracted from paternal self-reported questionnaires administered at 8 weeks, 8 months, 1 year 9 months, 2 years 9 months and 3 years 11 months. Higher factor scores represented more paternal enjoyment, affection and warmth toward the child.

*Factor 4 Paternal involvement in childcare:* 8 items describing frequency of paternal involvement in various aspects of childcare (e.g., ‘frequency partner feeds child per week’, ‘frequency partner puts child to bed per week’, ‘frequency partner bathes child per week’) were extracted from paternal self-reported questionnaires administered at 8 weeks and 8 months. Higher factor scores represented higher frequency of paternal involvement in childcare.

*Factor 5 Paternal worries about child:* 4 items pertaining to paternal worries about the child (e.g., ‘partner worries about child when at work’, ‘partner anxious if someone else looks after child’, ‘partner worries about study child when at work’) were extracted from paternal self-reported questionnaires administered at 1 year 9 months and 2 years 9 months. Higher factor scores represented lower levels of paternal worries about the child.

*Factor 6 Paternal beliefs regarding caregiving:* 6 items relating to paternal parenting principles and practices related to structure, regularity and routine in infant care (e.g., ‘babies should fit into parents’ routine’, ‘babies should be fed when hungry’) and attunement, i.e. responsiveness to infant cues (e.g., ‘babies should be picked up when cry’) were extracted from paternal self-reported questionnaires administered at 8 months and 1 year 9 months. Higher factor scores represented more paternal appreciation of regular routine and higher levels of attunement and responsiveness to child’s cues.



## MATERNAL POSTNATAL DEPRESSIVE SYMPTOMS AND OFFSPRING DEVELOPMENT: ROLE OF PATERNAL INVOLVEMENT

### *Mother-Focused Paternal Involvement*

*Factor 1 Paternal help with household tasks:* 12 items related to various aspects of paternal help with household tasks (e.g., ‘partner helped with cleaning home since birth’, ‘partner helped with housework since birth’, ‘partner gave help with preparing meals’) were extracted from paternal self-reported questionnaires administered at 8 weeks and 8 months. Higher factor scores represented higher levels of paternal help with household tasks since the child was born.

*Factor 2 Paternal perception of maternal ‘gatekeeping’:* 7 items relating to paternal perceptions of maternal beliefs and behaviours that encourage or hinder paternal involvement in childcare, i.e., maternal ‘gatekeeping’, (e.g., ‘mother excludes partner from childcare’, ‘partner always getting under mother’s feet, ‘mother dislikes partner being involved with childcare’) were extracted from paternal self-reported questionnaires administered at 8 weeks. Higher factor scores indicated higher levels of paternal perception of being supported by the mother and included in childcare, i.e. less maternal ‘gatekeeping’.

*Factor 3 Paternal beliefs regarding mother-father relationship and parenting:* 3 items relating to paternal beliefs regarding the impact of having a child on father-mother relationship (e.g., ‘parenthood has made partner and mother closer’, ‘mother no longer gives partner attention’) were extracted from paternal self-reported questionnaires administered at 8 weeks. Higher factor scores represented paternal beliefs more concordant with positive changes in the nature of mother-father relationship following the birth of the child.

*Factor 4 Paternal attitudes to employment and parenthood:* 5 items relating to paternal beliefs regarding maternal expectations around employment, childcare and paternal difficulties to manage childcare and employment (e.g., ‘mother expects partner to take child

## MATERNAL POSTNATAL DEPRESSIVE SYMPTOMS AND OFFSPRING DEVELOPMENT: ROLE OF PATERNAL INVOLVEMENT

after work’, ‘partner too tired to take child after work’, ‘partner finds it hard to cope with child after work’) were extracted from paternal self-reported questionnaires at 8 weeks and 2 years 9 months. Higher factor scores indicated paternal beliefs concordant with less maternal pressure to look after child after work and less difficulties with managing childcare and employment.

### **Associations Between Child-Focused and Mother-Influenced Dimensions of Paternal Involvement**

Paternal parenting confidence was strongly associated with less conflictual father-child relationship, more paternal enjoyment and involvement in childcare and less paternal worries about the child (Table S3). Conflictual father-child relationship was associated with less enjoyment and warmth, less involvement in childcare, less appreciation of structure and more worries about the child. Paternal enjoyment and warmth were associated with more involvement in childcare, more paternal appreciation of structure and higher levels of attunement to child’s cues. Paternal worries about the child were associated with less appreciation of structure and less involvement in childcare. Paternal beliefs more concordant with the positive impact of having a child on mother-father relationship were associated with higher levels of paternal help with household tasks and less pressure to manage childcare and employment. Paternal perception of maternal support and inclusion in childcare were associated with higher levels of paternal involvement in household tasks, better ability to manage employment and childcare, and more positive feelings on the changing nature of mother-father relationship following the birth of the child.

### **Associations Between Maternal PND, Child-Focused and Mother-Influenced Dimensions of Paternal Involvement and Offspring Emotional and Behavioural Development**

## MATERNAL POSTNATAL DEPRESSIVE SYMPTOMS AND OFFSPRING DEVELOPMENT: ROLE OF PATERNAL INVOLVEMENT

Full description of estimates for Model 1 is provided below, with full description of estimates for Model 2 provided in the main manuscript.

### *Exposure (Maternal PND) – Mediator (Paternal Involvement) Associations*

In Model 1 (adjusted for child PGS and antenatal baseline confounders; Table 2) maternal PND at 8 weeks was strongly associated with less paternal parenting confidence ( $\beta=-0.049$ , 95% CI: -0.061, -0.037,  $p\leq 0.001$ ), more father-child conflict ( $\beta=-0.053$ , 95% CI: -0.063, -0.043,  $p\leq 0.001$ ), less paternal enjoyment and warmth ( $\beta=-0.032$ , 95% CI: -0.042, -0.022,  $p\leq 0.001$ ), more paternal worries about the child ( $\beta=-0.027$ , 95% CI: -0.039, -0.015,  $p\leq 0.001$ ), higher levels of perceived maternal ‘gatekeeping’ ( $\beta=-0.040$ , 95% CI: -0.054, -0.026,  $p\leq 0.001$ ), more negative feelings regarding the impact the birth of the child have had on mother-father relationship ( $\beta=-0.030$ , 95% CI: -0.042, -0.018,  $p\leq 0.001$ ), and paternal feelings of more pressure to look after the child after work and more struggles to manage childcare and employment ( $\beta=-0.031$ , 95% CI: -0.041, -0.021,  $p\leq 0.001$ ; Table 2).

Maternal PND also had an indirect effect on paternal engagement via paternal PND (Table 3). Specifically, maternal PND was strongly associated with paternal PND ( $\beta=0.139$ , 95% CI: 0.115, 0.162,  $p\leq 0.001$ ), which, in turn, was strongly associated with less paternal parenting confidence ( $\beta=-0.812$ , 95% CI: -0.935, -0.689,  $p\leq 0.001$ ), less enjoyment and warmth ( $\beta=-0.784$ , 95% CI: -0.884, -0.684,  $p\leq 0.001$ ), less involvement in childcare ( $\beta=-0.163$ , 95% CI: -0.200, -0.128,  $p\leq 0.001$ ) and appreciation of regular routine ( $\beta=-0.102$ , 95% CI: -0.141, -0.063,  $p\leq 0.001$ ), more father-child conflict ( $\beta=-0.975$ , 95% CI: -1.124, -0.826,  $p\leq 0.001$ ) and more paternal worries about the child ( $\beta=-0.117$ , 95% CI: -0.150, -0.084,  $p\leq 0.001$ ), less paternal help with household tasks ( $\beta=-0.061$ , 95% CI: -0.083, -0.039,  $p\leq 0.001$ ), higher levels of perceived maternal ‘gatekeeping’ ( $\beta=-0.366$ , 95% CI: -0.427, -0.305,  $p\leq 0.001$ ), more negative feelings regarding the impact the birth of the child have had

## MATERNAL POSTNATAL DEPRESSIVE SYMPTOMS AND OFFSPRING DEVELOPMENT: ROLE OF PATERNAL INVOLVEMENT

on mother-father relationship ( $\beta=-0.416$ , 95% CI: -0.494, -0.338,  $p\leq 0.001$ ), and paternal feelings of more pressure to look after the child after work and more struggles to manage childcare and employment ( $\beta=-0.169$ , 95% CI: -0.194, -0.143,  $p\leq 0.001$ ; Table 3).

### *Mediator (Paternal Involvement) – Outcome (Offspring Emotional and Behavioural Development) Associations*

In Model 1, lower levels of paternal parenting confidence ( $\beta=-0.597$ , 95% CI: -0.789, -0.404,  $p\leq 0.001$ ), warmth and enjoyment ( $\beta=-0.379$ , 95% CI: -0.551, -0.206,  $p\leq 0.001$ ), higher levels of father-child conflict ( $\beta=-0.779$ , 95% CI: -0.961, -0.597,  $p\leq 0.001$ ) and worries about the child ( $\beta=-0.277$ , 95% CI: -0.479, -0.075,  $p=0.007$ ) were associated with higher risk of offspring emotional and behavioural difficulties at age 7 years (Table 2). Out of all mother-influenced dimensions of paternal involvement, only paternal feelings of more pressure to look after the child after work and more struggles to manage childcare and employment were associated with increased risk of offspring emotional and behavioural difficulties ( $\beta=-0.224$ , 95% CI: -0.391, -0.057,  $p=0.008$ ).

### *Direct and Mediated Effects*

In Model 1 (adjusted for child PGS and antenatal baseline confounders; Table 4), there was evidence of total indirect effect from early maternal PND to offspring development at age 7 years through the combination of all parenting factors capturing child-focused ( $\beta=0.090$ , 95% CIs: 0.063, 0.117,  $p\leq 0.001$ ), but not mother-influenced dimensions of paternal involvement ( $\beta=0.010$ , 95% CIs: -0.008, 0.028,  $p=0.291$ ). There was strong evidence of total and direct effects from maternal PND to offspring emotional and behavioural development at age 7 years in models capturing both child-focused (total effect:  $\beta=0.210$ , 95% CIs: 0.171, 0.250,  $p\leq 0.001$ ; direct effect:  $\beta=0.120$ , 95% CIs: 0.077, 0.163,  $p\leq 0.001$ ) and mother-

## MATERNAL POSTNATAL DEPRESSIVE SYMPTOMS AND OFFSPRING DEVELOPMENT: ROLE OF PATERNAL INVOLVEMENT

influenced (total effect:  $\beta=0.210$ , 95% CIs: 0.171, 0.250,  $p\leq 0.001$ ; direct effect:  $\beta=0.200$ , 95% CIs: 0.157, 0.243,  $p\leq 0.001$ ) paternal involvement. Amongst child-focused dimensions of paternal involvement, there was evidence for specific indirect effects through paternal parenting confidence ( $\beta=0.030$ , 95% CIs: 0.018, 0.042,  $p\leq 0.001$ ), paternal conflictual relationship with the child ( $\beta=0.041$ , 95% CIs: 0.029, 0.053,  $p\leq 0.001$ ), paternal enjoyment and warmth ( $\beta=0.012$ , 95% CIs: 0.004, 0.020,  $p=0.001$ ), and paternal worries about the child ( $\beta=0.007$ , 95% CIs: 0.001, 0.013,  $p=0.028$ ), but not paternal involvement in childcare and endorsement of caregiving structure and attunement to child's cues. There was only some evidence for specific indirect effect through paternal attitudes to employment and parenthood ( $\beta=0.007$ , 95% CIs: 0.001, 0.013,  $p=0.032$ ), although 95% CIs were wide, amongst mother-influenced dimensions of paternal involvement.

### **Sensitivity Analyses: Missing Data**

We repeated direct and mediated effects analyses on imputed datasets to examine the impact of response attrition on our findings. Characteristics of the sample by the completeness of the data are presented in Table S4. Participants comprising our analytical sample were from a higher socioeconomic background as indexed by lower proportion of those reporting financial difficulties and higher proportion of those reporting residing owned/mortgaged accommodation and married marital status compared to the original ALSPAC sample. The results from the analyses using the imputed data supported our findings resulting in the similar pattern of results and over-arching conclusions as our main findings in the complete case analyses (Table S5) with one notable difference. In Model 2, there was stronger evidence for the specific indirect effect through paternal conflictual relationship with the child ( $\beta=0.042$ , 95% CIs: 0.005, 0.079,  $p=0.028$ ), with some emerging evidence for a specific indirect effect through paternal worries about the child although the

MATERNAL POSTNATAL DEPRESSIVE SYMPTOMS AND OFFSPRING  
DEVELOPMENT: ROLE OF PATERNAL INVOLVEMENT

95% CIs were wide ( $\beta=0.006$ , 95% CI 0.001, 0.012,  $p=0.037$ ) compared to complete case analyses (Table 4).

## MATERNAL POSTNATAL DEPRESSIVE SYMPTOMS AND OFFSPRING DEVELOPMENT: ROLE OF PATERNAL INVOLVEMENT

### References

Belsky, J., Youngblade, L., Rovine, M., & Volling, B. (1991). Patterns of marital change and parent-child interaction. *Journal of Marriage and the Family*, 487-498.

<https://doi.org/10.2307/352914>

Cabrera, N. J., Fitzgerald, H. E., Bradley, R. H., & Roggman, L. (2014). The ecology of father-child relationships: An expanded model. *Journal of Family Theory & Review*, 6(4), 336-354. <https://doi.org/10.1111/jftr.12054>

Cole, S. R., & Hernán, M. A. (2002). Fallibility in estimating direct effects. *International Journal of Epidemiology*, 31(1), 163-165. <https://doi.org/10.1093/ije/31.1.163>

Cox, J. L., Holden, J. M., & Sagovsky, R. (1987). Detection of postnatal depression: development of the 10-item Edinburgh Postnatal Depression Scale. *British Journal of Psychiatry*, 150(6), 782-786. <https://doi.org/10.1192/bjp.150.6.782>

Feldman, R. (2000). Parents' convergence on sharing and marital satisfaction, father involvement, and parent-child relationship at the transition to parenthood. *Infant Mental Health Journal: Official Publication of The World Association for Infant Mental Health*, 21(3), 176-191. [https://doi.org/10.1002/1097-0355\(200007\)21:3<176::AID-IMHJ3>3.0.CO;2-4](https://doi.org/10.1002/1097-0355(200007)21:3<176::AID-IMHJ3>3.0.CO;2-4)

Luciano, M., Hagenaars, S. P., Davies, G., Hill, W. D., Clarke, T. K., Shirali, M., Harris, S. E., Marioni, R. E., Liewald, D. C., Fawns-Ritchie, C., Adams, M. J., Howard, D. M., Lewis, C. M., Gale, C. R., McIntosh, A. M., & Deary, I. J. (2018). Association analysis in over 329,000 individuals identifies 116 independent variants influencing neuroticism. *Nature Genetics*, 50(1), 6-11. <https://doi.org/10.1038/s41588-017-0013-8>

## MATERNAL POSTNATAL DEPRESSIVE SYMPTOMS AND OFFSPRING DEVELOPMENT: ROLE OF PATERNAL INVOLVEMENT

Marsiglio, W., Day, R. D., & Lamb, M. E. (2000). Exploring fatherhood diversity: Implications for conceptualizing father involvement. *Marriage & Family Review*, 29(4), 269-293. [https://doi.org/10.1300/J002v29n04\\_03](https://doi.org/10.1300/J002v29n04_03)

Massoudi, P., Hwang, C. P., & Wickberg, B. (2013). How well does the Edinburgh Postnatal Depression Scale identify depression and anxiety in fathers? A validation study in a population based Swedish sample. *Journal of affective disorders*, 149(1-3), 67-74. <https://doi.org/10.1016/j.jad.2013.01.005>

Matthey, S., Barnett, B., Kavanagh, D. J., & Howie, P. (2001). Validation of the Edinburgh Postnatal Depression Scale for men, and comparison of item endorsement with their partners. *Journal of affective disorders*, 64(2-3), 175-184. [https://doi.org/10.1016/S0165-0327\(00\)00236-6](https://doi.org/10.1016/S0165-0327(00)00236-6)

Miller, T. (2018). Paternal and maternal gatekeeping? Choreographing care. *Sociologica*, 12, 25-35. <https://doi.org/10.6092/issn.1971-8853/9083>

Muthén, L. K., & Muthén, B. O. (2015). *Mplus User's Guide*, 7<sup>th</sup> ed. Muthén & Muthén: Los Angeles, CA.

Palkovitz, R. (2019). Expanding our focus from father involvement to father-child relationship quality. *Journal of Family Theory & Review*, 11(4), 576-591. <https://doi.org/10.1111/jftr.12352>

Pleck, J. H. (2012). Integrating father involvement in parenting research. *Parenting*, 12(2-3), 243-253. <https://doi.org/10.1080/15295192.2012.683365>

Royston, P., & White, I. R. (2011). Multiple imputation by chained equations (MICE): implementation in Stata. *Journal of Statistical Software*, 45(4), 1-20.



MATERNAL POSTNATAL DEPRESSIVE SYMPTOMS AND OFFSPRING DEVELOPMENT: ROLE OF PATERNAL INVOLVEMENT

Schacht, P. M., Cummings, E. M., & Davies, P. T. (2009). Fathering in family context and child adjustment: A longitudinal analysis. *Journal of Family Psychology, 23*(6), 790.

<https://doi.org/10.1037/a0016741>

Sheikh, M. A., Abelsen, B., & Olsen, J. A. (2016). Differential recall bias, intermediate confounding, and mediation analysis in life course epidemiology: an analytic framework with empirical example. *Frontiers in Psychology, 7*, 1828.

<https://doi.org/10.3389/fpsyg.2016.01828>

Sterne, J. A. C., White, I. R., Carlin, J. B., Royston, P., Carpenter, J. R. (2009). Multiple imputation for missing data in epidemiological and clinical research: potential and pitfalls.

*BMJ*, 338, b2393-b2393. <https://doi.org/10.1136/bmj.b2393>

White, I. R., Royston, P., & Wood, A. M. (2011). Multiple imputation using chained equations: issues and guidance for practice. *Statistics in Medicine, 30*(4), 377-99.

<https://doi.org/10.1002/sim.4067>

MATERNAL POSTNATAL DEPRESSIVE SYMPTOMS AND OFFSPRING DEVELOPMENT: ROLE OF PATERNAL INVOLVEMENT

**Table S1.** *Derived factors, items, standardised factor loadings and fit indices for the measurement model capturing child-focused dimensions of paternal involvement*

| Item       | Age at assessment/Factor                            | Item description                                               | Factor loading | S.E.  |
|------------|-----------------------------------------------------|----------------------------------------------------------------|----------------|-------|
| <b>I</b>   | <b>Paternal parenting confidence</b>                |                                                                |                |       |
| 1.         | 8 weeks                                             | Partner feels confident with child                             | 0.521          | 0.016 |
| 2.         | 8 weeks                                             | Partner happy with the way he brings up child                  | 0.657          | 0.015 |
| 3.         | 8 weeks                                             | Partner regrets lack of experience with child                  | 0.363          | 0.022 |
| 4.         | 8 weeks                                             | Partner feels well-prepared for birth and childcare            | 0.403          | 0.015 |
| 5.         | 8 weeks                                             | Having a baby is as expected                                   | 0.356          | 0.015 |
| 6.         | 8 months                                            | Partner feels confident with child                             | 0.711          | 0.021 |
| 7.         | 8 months                                            | Partner unsure whether doing the right thing                   | 0.436          | 0.017 |
| 8.         | 1 year 9 months                                     | Partner afraid to be alone with toddler                        | 0.478          | 0.055 |
| 9.         | 1 year 9 months                                     | Partner sure doing the right thing for child                   | 0.574          | 0.016 |
| 10.        | 2 years 9 months                                    | Partner feels confident with child                             | 0.694          | 0.021 |
| 11.        | 2 years 9 months                                    | Partner feels constantly unsure if doing right thing for child | 0.434          | 0.019 |
| <b>II</b>  | <b>Paternal conflictual relationship with child</b> |                                                                |                |       |
| 1.         | 8 weeks                                             | Partner so stressed at home it is a bad influence on child     | 0.557          | 0.017 |
| 2.         | 8 weeks                                             | Partner regrets having child                                   | 0.688          | 0.022 |
| 3.         | 8 months                                            | Partner dislikes mess surrounding child                        | 0.532          | 0.014 |
| 4.         | 8 months                                            | Partner finds child crying unbearable                          | 0.564          | 0.014 |
| 5.         | 8 months                                            | Partner feels they have no time to themselves                  | 0.590          | 0.013 |
| 6.         | 1 year 9 months                                     | Child whining can make parent want to hit                      | 0.477          | 0.015 |
| 7.         | 1 year 9 months                                     | Having young child is absolutely exhausting                    | 0.451          | 0.014 |
| 8.         | 1 year 9 months                                     | Smacking is the best way to discipline child                   | 0.168          | 0.017 |
| 9.         | 1 year 9 months                                     | Parent can feel exasperated calming child                      | 0.366          | 0.015 |
| 10.        | 1 year 9 months                                     | Child never gets on partner's nerves                           | 0.306          | 0.015 |
| 11.        | 1 year 9 months                                     | Partner cannot bear it when child cries                        | 0.364          | 0.016 |
| 12.        | 1 year 9 months                                     | Partner feels desperate when child complains                   | 0.548          | 0.015 |
| 13.        | 1 year 9 months                                     | Child demands bring intense anger                              | 0.555          | 0.017 |
| 14.        | 2 years 9 months                                    | Partner dislikes mess surrounding child                        | 0.550          | 0.015 |
| 15.        | 2 years 9 months                                    | Partner cannot bear it when child cries                        | 0.434          | 0.016 |
| 16.        | 2 years 9 months                                    | Partner feels they have no time to themselves                  | 0.556          | 0.015 |
| 17.        | 2 years 9 months                                    | Partner often gets very irritated with child                   | 0.454          | 0.020 |
| 18.        | 2 years 9 months                                    | Partner has frequent battles of will with child                | 0.290          | 0.021 |
| 19.        | 2 years 9 months                                    | Child gets on partner's nerves                                 | 0.438          | 0.025 |
| <b>III</b> | <b>Paternal enjoyment and warmth</b>                |                                                                |                |       |
| 1.         | 8 weeks                                             | Partner is making a strong bond with child                     | 0.515          | 0.013 |
| 2.         | 8 weeks                                             | Partner feels guilty at not enjoying child                     | 0.651          | 0.015 |
| 3.         | 8 weeks                                             | Child made partner more fulfilled                              | 0.486          | 0.013 |
| 4.         | 8 months                                            | Partner enjoys child                                           | 0.657          | 0.014 |
| 5.         | 8 months                                            | Partner preferred not to have had child                        | 0.559          | 0.018 |
| 6.         | 8 months                                            | Pleasure watching child develop                                | 0.693          | 0.016 |
| 7.         | 8 months                                            | Partner feels should enjoy child, but they are not             | 0.704          | 0.015 |

MATERNAL POSTNATAL DEPRESSIVE SYMPTOMS AND OFFSPRING DEVELOPMENT: ROLE OF PATERNAL INVOLVEMENT

|                                                 |                   |                                                          |                                 |       |
|-------------------------------------------------|-------------------|----------------------------------------------------------|---------------------------------|-------|
| 8.                                              | 8 months          | Child made partner more fulfilled                        | 0.550                           | 0.012 |
| 9.                                              | 8 months          | Partner feels children are fun                           | 0.646                           | 0.012 |
| 10.                                             | 8 months          | Partner enjoys seeing child after work                   | 0.639                           | 0.016 |
| 11.                                             | 8 months          | Partners feels having child made more fulfilled          | 0.541                           | 0.016 |
| 12.                                             | 8 months          | Talking to child is important                            | 0.352                           | 0.036 |
| 13.                                             | 8 months          | Cuddling child is very important                         | 0.375                           | 0.037 |
| 14.                                             | 1 year 9 months   | Children are fun                                         | 0.568                           | 0.014 |
| 15.                                             | 1 year 9 months   | Partner really loves child                               | 0.708                           | 0.020 |
| 16.                                             | 1 year 9 months   | Partner glad they had child                              | 0.670                           | 0.016 |
| 17.                                             | 1 year 9 months   | Partner feels great pleasure watching child grow         | 0.673                           | 0.018 |
| 18.                                             | 1 year 9 months   | Child gives great joy                                    | 0.705                           | 0.016 |
| 19.                                             | 2 years 9 months  | Partner really enjoys child                              | 0.659                           | 0.015 |
| 20.                                             | 2 years 9 months  | Partner feels great pleasure watching child develop      | 0.730                           | 0.017 |
| 21.                                             | 2 years 9 months  | Partner feels should enjoy child, but they are not       | 0.604                           | 0.017 |
| 22.                                             | 2 years 9 months  | Partners feels having child made more fulfilled          | 0.597                           | 0.014 |
| 23.                                             | 2 years 9 months  | Partner enjoys seeing child after work                   | 0.607                           | 0.017 |
| 24.                                             | 3 years 11 months | Child makes partner feel very happy                      | 0.286                           | 0.062 |
| 25.                                             | 3 years 11 months | Partner feels very close to child                        | 0.422                           | 0.045 |
| 26.                                             | 3 years 11 months | Child is very affectionate to partner                    | 0.384                           | 0.037 |
| 27.                                             | 3 years 11 months | Cuddling is best way to calm child                       | 0.643                           | 0.015 |
| <b>IV Paternal involvement in childcare</b>     |                   |                                                          |                                 |       |
| 1.                                              | 8 weeks           | Frequency partner changes nappy per week                 | 0.644                           | 0.014 |
| 2.                                              | 8 weeks           | Frequency partner bathes child per week                  | 0.387                           | 0.014 |
| 3.                                              | 8 weeks           | Frequency partner plays with child per week              | 0.751                           | 0.022 |
| 4.                                              | 8 weeks           | Frequency partner walks child outside per week           | 0.220                           | 0.014 |
| 5.                                              | 8 weeks           | Frequency partner puts child to bed per week             | 0.593                           | 0.013 |
| 6.                                              | 8 weeks           | Frequency partner feeds child or helps at night per week | 0.515                           | 0.014 |
| 7.                                              | 8 weeks           | Frequency partner feeds child per week                   | 0.642                           | 0.017 |
| 8.                                              | 8 months          | Frequency partner gives help changing nappies            | 0.449                           | 0.020 |
| <b>V Paternal worries about child</b>           |                   |                                                          |                                 |       |
| 1.                                              | 1 year 9 months   | Partner worries if child is eating enough                | 0.733                           | 0.018 |
| 2.                                              | 1 year 9 months   | Get child to eat right food makes partner anxious        | 0.935                           | 0.021 |
| 3.                                              | 1 year 9 months   | Partner anxious if someone else looks after child        | 0.372                           | 0.017 |
| 4.                                              | 2 years 9 months  | Partner worries about study child when at work           | 0.340                           | 0.024 |
| <b>VI Paternal beliefs regarding caregiving</b> |                   |                                                          |                                 |       |
| 1.                                              | 8 months          | Babies should be picked up when cry                      | 0.482                           | 0.030 |
| 2.                                              | 8 months          | Babies should be fed when hungry                         | 0.552                           | 0.033 |
| 3.                                              | 8 months          | Parents need to adapt lives to babies needs              | 0.320                           | 0.026 |
| 4.                                              | 8 months          | Baby should fit into parents' routine                    | 0.143                           | 0.026 |
| 5.                                              | 8 months          | Babies should be stimulated to develop well              | 0.311                           | 0.029 |
| 6.                                              | 1 year 9 months   | Toddlers should be able to eat when they ask             | 0.207                           | 0.042 |
| <b>Latent factor model fit indices</b>          |                   |                                                          |                                 |       |
| Free parameters                                 |                   |                                                          | 299                             |       |
| Root Mean Square Error of Approximation (RMSEA) |                   |                                                          | 0.022 (95%CI<br>0.021 to 0.022) |       |
| Comparative Fit Index (CFI)                     |                   |                                                          | 0.904                           |       |
| Tucker-Lewis Index (TLI)                        |                   |                                                          | 0.899                           |       |

MATERNAL POSTNATAL DEPRESSIVE SYMPTOMS AND OFFSPRING  
DEVELOPMENT: ROLE OF PATERNAL INVOLVEMENT

**Table S2.** *Derived factors, items, standardised factor loadings and fit indices for the measurement model capturing mother-influenced dimensions of paternal involvement*

| Item                                                                           | Age at assessment/Factor | Item description                                       | Factor loading                   | S.E.  |
|--------------------------------------------------------------------------------|--------------------------|--------------------------------------------------------|----------------------------------|-------|
| <b>I Paternal help with household tasks</b>                                    |                          |                                                        |                                  |       |
| 1.                                                                             | 8 weeks                  | Partner helped with shopping since birth               | 0.518                            | 0.011 |
| 2.                                                                             | 8 weeks                  | Partner helped with cleaning home since birth          | 0.591                            | 0.011 |
| 3.                                                                             | 8 weeks                  | Partner helped with meal preparation since birth       | 0.599                            | 0.013 |
| 4.                                                                             | 8 weeks                  | Partner helped with washing up since birth             | 0.687                            | 0.011 |
| 5.                                                                             | 8 weeks                  | Partner helped with housework since birth              | 0.642                            | 0.009 |
| 6.                                                                             | 8 weeks                  | Partner helped with cooking meals since birth          | 0.613                            | 0.010 |
| 7.                                                                             | 8 weeks                  | Partner helped with clothes wash since birth           | 0.491                            | 0.011 |
| 8.                                                                             | 8 months                 | Partner gave help with shopping                        | 0.427                            | 0.012 |
| 9.                                                                             | 8 months                 | Partner gave help with cleaning home                   | 0.533                            | 0.011 |
| 10.                                                                            | 8 months                 | Partner gave help preparing meals                      | 0.688                            | 0.011 |
| 11.                                                                            | 8 months                 | Partner gave help washing up                           | 0.498                            | 0.012 |
| 12.                                                                            | 8 months                 | Partner gave help washing clothes                      | 0.414                            | 0.012 |
| <b>II Paternal perception of maternal ‘gatekeeping’</b>                        |                          |                                                        |                                  |       |
| 1.                                                                             | 8 weeks                  | Pressure on partner to be present at birth             | 0.240                            | 0.023 |
| 2.                                                                             | 8 weeks                  | Mother excludes partner from childcare                 | 0.660                            | 0.020 |
| 3.                                                                             | 8 weeks                  | Partner feels mother does not trust him with childcare | 0.696                            | 0.016 |
| 4.                                                                             | 8 weeks                  | Partner happy with the way mother brings up child      | 0.503                            | 0.023 |
| 5.                                                                             | 8 weeks                  | Home is woman’s place, no part for me                  | 0.649                            | 0.024 |
| 6.                                                                             | 8 weeks                  | Partner always getting under mother’s feet             | 0.573                            | 0.017 |
| 7.                                                                             | 8 weeks                  | Mother dislikes partner being involved with childcare  | 0.718                            | 0.027 |
| <b>III Paternal beliefs regarding mother-father relationship and parenting</b> |                          |                                                        |                                  |       |
| 1.                                                                             | 8 weeks                  | Parenthood has made partner and mother closer          | 0.363                            | 0.017 |
| 2.                                                                             | 8 weeks                  | Mother no longer gives partner attention               | 0.709                            | 0.018 |
| 3.                                                                             | 8 weeks                  | Partner feels hurt by attention mother gives child     | 0.758                            | 0.024 |
| <b>IV Paternal beliefs regarding employment and parenthood</b>                 |                          |                                                        |                                  |       |
| 1.                                                                             | 8 weeks                  | Mother expects partner to take child after work        | 0.514                            | 0.006 |
| 2.                                                                             | 8 weeks                  | Partner too tired to take child after work             | 0.898                            | 0.004 |
| 3.                                                                             | 8 weeks                  | Partner takes child after work, so mother is free      | 0.708                            | 0.006 |
| 4.                                                                             | 8 weeks                  | Partner finds child hard to manage after work          | 0.899                            | 0.004 |
| 5.                                                                             | 2 years 9 months         | Partner finds it hard to cope with child after work    | 0.303                            | 0.016 |
| <b>Latent factor model fit indices</b>                                         |                          |                                                        |                                  |       |
| Free parameters                                                                |                          |                                                        | 118                              |       |
| Root Mean Square Error of Approximation (RMSEA)                                |                          |                                                        | 0.044 (95% CI<br>0.043 to 0.045) |       |
| Comparative Fit Index (CFI)                                                    |                          |                                                        | 0.957                            |       |
| Tucker-Lewis Index (TLI)                                                       |                          |                                                        | 0.950                            |       |

## MATERNAL POSTNATAL DEPRESSIVE SYMPTOMS AND OFFSPRING DEVELOPMENT: ROLE OF PATERNAL INVOLVEMENT

**Table S3.** Associations between child-focused and mother-influenced dimensions of paternal involvement

| Paternal involvement factors                                                                |                                                                     | Point estimate<br>( $\beta$ ) <sup>a</sup> | S.E.  | p-value      |
|---------------------------------------------------------------------------------------------|---------------------------------------------------------------------|--------------------------------------------|-------|--------------|
| <b>Six specific factors capturing child-focused dimensions of paternal involvement</b>      |                                                                     |                                            |       |              |
| <i>Paternal parenting confidence</i>                                                        | Paternal conflictual relationship with child                        | 0.682                                      | 0.014 | $\leq 0.001$ |
|                                                                                             | Paternal enjoyment and warmth                                       | 0.687                                      | 0.013 | $\leq 0.001$ |
|                                                                                             | Paternal beliefs regarding caregiving                               | -0.001                                     | 0.025 | 0.836        |
|                                                                                             | Paternal involvement in childcare                                   | 0.241                                      | 0.017 | $\leq 0.001$ |
|                                                                                             | Paternal worries about child                                        | 0.294                                      | 0.020 | $\leq 0.001$ |
| <i>Paternal conflictual relationship with child</i>                                         | Paternal enjoyment and warmth                                       | 0.695                                      | 0.011 | $\leq 0.001$ |
|                                                                                             | Paternal appreciation of routine                                    | 0.057                                      | 0.023 | 0.017        |
|                                                                                             | Paternal involvement in childcare                                   | 0.077                                      | 0.018 | $\leq 0.001$ |
|                                                                                             | Paternal worries about child                                        | 0.277                                      | 0.018 | $\leq 0.001$ |
| <i>Paternal enjoyment and warmth</i>                                                        | Paternal appreciation of regular routine                            | 0.223                                      | 0.022 | $\leq 0.001$ |
|                                                                                             | Paternal involvement in childcare                                   | 0.260                                      | 0.016 | $\leq 0.001$ |
|                                                                                             | Paternal worries about child                                        | 0.002                                      | 0.019 | 0.904        |
| <i>Paternal beliefs regarding caregiving</i>                                                | Paternal involvement in childcare                                   | 0.066                                      | 0.024 | 0.006        |
|                                                                                             | Paternal worries about child                                        | -0.116                                     | 0.026 | $\leq 0.001$ |
| <i>Paternal involvement in childcare</i>                                                    | Paternal worries about child                                        | -0.062                                     | 0.020 | 0.002        |
| <b>Four specific factors capturing mother-influenced dimensions of paternal involvement</b> |                                                                     |                                            |       |              |
| <i>Paternal perceptions of maternal 'gatekeeping'</i>                                       | Paternal beliefs regarding mother-father relationship and parenting | 0.740                                      | 0.020 | $\leq 0.001$ |
|                                                                                             | Paternal help with household tasks                                  | 0.209                                      | 0.018 | $\leq 0.001$ |

## MATERNAL POSTNATAL DEPRESSIVE SYMPTOMS AND OFFSPRING DEVELOPMENT: ROLE OF PATERNAL INVOLVEMENT

|                                                                            |                                                      |        |       |              |
|----------------------------------------------------------------------------|------------------------------------------------------|--------|-------|--------------|
|                                                                            | Paternal beliefs regarding employment and parenthood | 0.283  | 0.017 | $\leq 0.001$ |
| <i>Paternal beliefs regarding mother-father relationship and parenting</i> | Paternal help with household tasks                   | 0.165  | 0.019 | $\leq 0.001$ |
|                                                                            | Paternal attitudes to employment and parenthood      | 0.302  | 0.017 | $\leq 0.001$ |
| <i>Paternal help with household tasks</i>                                  | Paternal beliefs regarding employment and parenthood | -0.002 | 0.014 | 0.898        |

---

Note: <sup>a</sup> Effect size are standardised (the variance of the latent factors was fixed to '1') regression coefficients ( $\beta$ )

MATERNAL POSTNATAL DEPRESSIVE SYMPTOMS AND OFFSPRING DEVELOPMENT: ROLE OF PATERNAL INVOLVEMENT

**Table S4.** *Distribution of sociodemographic characteristics in the original Avon*

*Longitudinal Study of Parents and Children (ALSPAC) Cohort and the study complete and imputed samples*

| Sample demographic characteristics assessed during pregnancy <sup>1</sup> | Core ALSPAC sample <sup>a</sup><br>(n=14,901) | Complete sample <sup>b</sup><br>(n=3,434) | Imputed sample <sup>c</sup><br>(n=6,029) |
|---------------------------------------------------------------------------|-----------------------------------------------|-------------------------------------------|------------------------------------------|
|                                                                           | (%)                                           | (%)                                       | (%)                                      |
| <i>Maternal educational attainment</i>                                    |                                               |                                           |                                          |
| A-Level/Degree                                                            | 62.4                                          | 52.0                                      | 56.7                                     |
| Minimal education/none/O-Level                                            | 37.6                                          | 48.0                                      | 43.3                                     |
| <i>Presence of financial difficulties</i>                                 |                                               |                                           |                                          |
| Financial difficulties                                                    | 78.8                                          | 85.4                                      | 82.7                                     |
| No financial difficulties                                                 | 21.2                                          | 14.6                                      | 17.3                                     |
| <i>Homeownership status</i>                                               |                                               |                                           |                                          |
| Owned/mortgaged                                                           | 79.0                                          | 89.7                                      | 84.3                                     |
| Private/council rented                                                    | 21.0                                          | 10.3                                      | 15.7                                     |
| <i>Marital status</i>                                                     |                                               |                                           |                                          |
| Married                                                                   | 75.0                                          | 86.9                                      | 82.7                                     |
| Never married                                                             | 25.0                                          | 13.1                                      | 17.3                                     |
|                                                                           | Mean (SD)                                     | Mean (SD)                                 | Mean (SD)                                |
| <i>Parental conflict</i>                                                  | 10.01 (1.77)                                  | 10.27 (1.66)                              | 10.13 (1.70)                             |
| <i>Maternal age</i>                                                       | 27.23 (4.96)                                  | 28.73 (4.28)                              | 28.09 (4.59)                             |
| <i>Paternal PND</i>                                                       | 3.35 (3.70)                                   | 3.18 (3.50)                               | 3.41 (3.67)                              |

Note: <sup>1</sup> Additional missing data on demographics: maternal educational attainment missing

for 3,237/21.7%; maternal age missing for 931/6.0%; financial difficulties missing for 2,292/14.6%; homeownership status missing for 4,699/30.0%; marital status missing for 2,092/13.4%; parental conflict missing for 3,562/22.8%; paternal PND missing for 8,572/54.8%.

<sup>a</sup> Core ALSPAC sample: no exposure or outcome data; <sup>b</sup> Complete sample: exposure, outcomes and confounders data available; <sup>c</sup> Imputed sample: imputed missing data on exposure, outcomes and confounders (except child PGS).

PGS: polygenic score for neuroticism; Paternal PND: paternal postnatal depression.

## MATERNAL POSTNATAL DEPRESSIVE SYMPTOMS AND OFFSPRING DEVELOPMENT: ROLE OF PATERNAL INVOLVEMENT

**Table S5.** Estimates of direct and mediated effects in the unadjusted model and models adjusted for child PGS, gender, antenatal baseline

confounders, and paternal PND as an intermediate confounder in imputed sample (n=6,029)

| Effect Size <sup>1</sup>                                    | Model estimates (n=6,029) |         |                       |         |                        |         |
|-------------------------------------------------------------|---------------------------|---------|-----------------------|---------|------------------------|---------|
|                                                             | Unadjusted model          |         | Model 1 <sup>a</sup>  |         | Model 2 <sup>b</sup>   |         |
|                                                             | <i>B</i> [95% CI]         | P-value | <i>B</i> [95% CI]     | P-value | <i>B</i> [95% CI]      | P-value |
| <b>Child-focused dimensions of paternal involvement</b>     |                           |         |                       |         |                        |         |
| 1. Total indirect effect <sup>*</sup>                       | 0.098 [0.074, 0.121]      | ≤0.001  | 0.083 [0.061, 0.104]  | ≤0.001  | 0.054 [-0.030, 0.138]  | 0.209   |
| 2. Direct effect <sup>**</sup>                              | 0.142 [0.110, 0.175]      | ≤0.001  | 0.118 [0.085, 0.151]  | ≤0.001  | 0.166 [0.088, 0.244]   | ≤0.001  |
| 3. Total effect <sup>***</sup>                              | 0.240 [0.212, 0.267]      | ≤0.001  | 0.201 [0.173, 0.228]  | ≤0.001  | 0.220 [0.061, 0.379]   | 0.006   |
| <b>4. Specific indirect effects</b>                         |                           |         |                       |         |                        |         |
| <i>Paternal parenting confidence</i>                        | 0.027 [0.019, 0.035]      | ≤0.001  | 0.025 [0.017, 0.033]  | ≤0.001  | 0.012 [-0.023, 0.047]  | 0.491   |
| <i>Paternal conflictual relationship with child</i>         | 0.042 [0.030, 0.054]      | ≤0.001  | 0.038 [0.028, 0.048]  | ≤0.001  | 0.042 [0.005, 0.079]   | 0.028   |
| <i>Paternal enjoyment and warmth</i>                        | 0.014 [0.010, 0.020]      | ≤0.001  | 0.012 [0.006, 0.018]  | 0.001   | -0.005 [-0.025, 0.015] | 0.625   |
| <i>Paternal involvement in childcare</i>                    | 0.001 [-0.001, 0.003]     | 0.488   | 0.001 [-0.001, 0.003] | 0.352   | 0.001 [-0.001, 0.003]  | 0.602   |
| <i>Paternal beliefs regarding caregiving</i>                | 0.001 [-0.001, 0.003]     | 0.634   | 0.001 [-0.001, 0.003] | 0.832   | -0.001 [-0.005, 0.003] | 0.520   |
| <i>Paternal worries about child</i>                         | 0.014 [0.006, 0.022]      | ≤0.001  | 0.008 [0.002, 0.014]  | 0.005   | 0.006 [0.001, 0.012]   | 0.037   |
| <b>Mother-influenced dimensions of paternal involvement</b> |                           |         |                       |         |                        |         |
| 1. Total indirect effect                                    | 0.021 [0.005, 0.037]      | 0.006   | 0.002 [-0.010, 0.014] | 0.716   | -0.014 [-0.034, 0.006] | 0.193   |



## MATERNAL POSTNATAL DEPRESSIVE SYMPTOMS AND OFFSPRING DEVELOPMENT: ROLE OF PATERNAL INVOLVEMENT

|                                                                            |                       |        |                       |        |                        |        |
|----------------------------------------------------------------------------|-----------------------|--------|-----------------------|--------|------------------------|--------|
| 2. <i>Direct effect</i> **                                                 | 0.222 [0.193, 0.251]  | ≤0.001 | 0.197 [0.166, 0.228]  | ≤0.001 | 0.191 [0.162, 0.220]   | ≤0.001 |
| 3. <i>Total effect</i> ***                                                 | 0.243 [0.215, 0.270]  | ≤0.001 | 0.199 [0.171, 0.226]  | ≤0.001 | 0.177 [0.086, 0.148]   | ≤0.001 |
| 4. <i>Specific indirect effects</i>                                        |                       |        |                       |        |                        |        |
| <i>Paternal help with household tasks</i>                                  | 0.001 [-0.001, 0.003] | 0.535  | 0.001 [-0.001, 0.003] | 0.784  | -0.005 [-0.017, 0.007] | 0.397  |
| <i>Paternal perception of maternal 'gatekeeping'</i>                       | 0.015 [0.003, 0.027]  | 0.007  | 0.002 [-0.010, 0.014] | 0.649  | -0.008 [-0.020, 0.004] | 0.191  |
| <i>Paternal beliefs regarding mother-father relationship and parenting</i> | 0.001 [-0.007, 0.009] | 0.687  | 0.001 [-0.005, 0.007] | 0.941  | 0.001 [-0.001, 0.003]  | 0.761  |
| <i>Paternal beliefs regarding employment and parenthood</i>                | 0.005 [0.001, 0.010]  | 0.006  | 0.001 [-0.001, 0.003] | 0.726  | 0.001 [-0.001, 0.003]  | 0.994  |

*Note:*<sup>1</sup> Effect size are unadjusted and adjusted regression coefficients (*B* unstandardised); unadjusted model (exposure, outcome and mediators only); Model 1: adjusted for child PGS and antenatal baseline confounders (child gender, financial problems, homeownership status, maternal age and education, parental conflict, marital status); Model 2: further adjusted for paternal PND at 8 months as an intermediate confounder.

**Model 1:** \* Total indirect effect = maternal PND->aspects of paternal engagement->offspring emotional and behavioural development; \*\*Direct effect = maternal PND-> offspring emotional and behavioural development; \*\*\*Total effect = total indirect effect + direct effect.

**Model 2:** \* Total indirect effect = maternal PND->aspects of paternal engagement->offspring emotional and behavioural development + maternal PND->paternal PND->aspects of paternal engagement -> offspring emotional and behavioural development; \*\*Direct effect = maternal PND->offspring emotional and behavioural development + maternal PND->paternal PND->offspring emotional and behavioural development; \*\*\*Total effect = total indirect effect + direct effect.

## MATERNAL POSTNATAL DEPRESSIVE SYMPTOMS AND OFFSPRING DEVELOPMENT: ROLE OF PATERNAL INVOLVEMENT

Maternal PND: maternal postnatal depression; PGS: polygenic score for neuroticism; Paternal PND: paternal postnatal depression.
